# Supplementary material for: Metagenomic analysis of microbial community structure and function in a improved biofilter with odorous gases
Source: Research Square preprint supplement (doi:10.21203/rs.3.rs-229916/v1), 2021-02-25
Supplement: Supplementary file 1 [file 8b9e73467344eb531b73c026.docx]

Figure S2 Length distribution of all predicted unigenes.
